# Supplementary material for: Genome-Wide Expression Analysis in Down Syndrome: Insight into Immunodeficiency
Source: PLoS One. 2012 Nov 14;7(11):e49130. doi: 10.1371/journal.pone.0049130 (PMC3498323; doi:10.1371/journal.pone.0049130)
Supplement: Table S2 — List of the dysregulated genes in child group. (XLS) [file pone.0049130.s004.xls]

## Sheet: Sheet1
Table S2. List of the dysregulated genes in child group
Probe Set ID	Genebank Accession Number	Gene Symbol	DS/Control Ratio	P (ANOVA)	Chromosome
2363852	NM_032738	FCRLA	0.56	0.00572	chr1
2369339	NM_152663	RALGPS2	0.43	0.0001	chr1
2438892	NM_031281	FCRL5	0.44	0.0008	chr1
2439052	NM_030764	FCRL2	0.49	0.00022	chr1
2443537	NM_181093	SCYL3	0.68	0.00403	chr1
2476671	NM_170672	RASGRP3	0.6	0.00505	chr2
2554975	NM_022893	BCL11A	0.59	0.0026	chr2
2566848	NM_001025108	AFF3	0.61	0.00665	chr2
2584787	NM_014900	COBLL1	0.46	0.00087	chr2
2638676	NM_018456	EAF2	0.5	0.00092	chr3
2667809	NM_017784	OSBPL10	0.43	3e-05	chr3
2688717	NM_181780	BTLA	0.6	0.00788	chr3
2691973	NM_019069	WDR5B	0.7	0.00213	chr3
2731636	NM_015393	PARM1	0.56	0.00864	chr4
2737596	NM_017935	BANK1	0.54	0.00361	chr4
2740507	NM_001128174	UGT8	0.67	0.00398	chr4
2766192	NM_030956	TLR10	0.46	0.00093	chr4
2860178	NM_005582	CD180	0.59	0.00756	chr5
2864849	NM_012446	SSBP2	0.56	0.00323	chr5
2899090	NM_003529	HIST1H3A	0.56	0.0075	chr6
2950145	NM_002120	HLA-DOB	0.49	7e-05	chr6
2950307	NM_002119	HLA-DOA	0.61	0.00075	chr6
3005444	NM_003596	TPST1	0.6	0.00288	chr7
3012064	NM_012395	PFTK1	0.47	0.00096	chr7
3029900	NM_014141	CNTNAP2	0.6	0.00182	chr7
3090209	NM_014265	ADAM28	0.71	0.00699	chr8
3091699	NM_006228	PNOC	0.5	6e-05	chr8
3105467	NM_001951	E2F5	0.49	0.00878	chr8
3131881	NM_001102559	PPAPDC1B	0.72	0.00827	chr8
3148871	NM_001099744	GOLSYN	0.74	0.00176	chr8
3168700	NM_032226	ZCCHC7	0.71	0.00444	chr9
3175274	NM_006200	PCSK5	0.64	0.00766	chr9
3189311	NM_006195	PBX3	0.65	0.00862	chr9
3204648	NM_001782	CD72	0.56	0.00184	chr9
3205293	NM_016734	PAX5	0.55	0.00189	chr9
3245881	NM_020945	WDFY4	0.61	0.00486	chr10
3277468	NM_014688	USP6NL	0.52	0.00072	chr10
3301713	NM_013314	BLNK	0.55	0.00421	chr10
3329099	NM_152312	GYLTL1B	0.59	0.00011	chr11
3332403	NM_152866	MS4A1	0.36	5e-05	chr11
3351675	NM_001716	CXCR5	0.49	0.00037	chr11
3356175	NM_021978	ST14	0.51	0.00023	chr11
3390860	NM_006235	POU2AF1	0.53	0.00429	chr11
3392044	BC009041	C11orf71	0.55	0.00279	chr11
3429555	NM_001008394	EID3	0.76	0.00196	chr12
3431553	NM_013300	C12orf24	0.69	0.00411	chr12
3451375	NM_153026	PRICKLE1	0.61	0.00593	chr12
3512948	NM_025113	C13orf18	0.47	0.0013	chr13
3555067	NR_026800	KIAA0125	0.58	0.00179	chr14
3578152	NM_021966	TCL1A	0.48	0.00027	chr14
3588062	NM_152595	PGBD4	0.69	0.00124	chr15
3597914	NM_024798	SNX22	0.58	0.00197	chr15
3724591	ENST00000056233	NFE2L3	0.45	0.00697	chr17
3741547	NM_002561	P2RX5	0.63	0.00688	chr17
3752258	NM_006495	EVI2B	0.7	0.00508	chr17
3766533	NM_000626	CD79B	0.46	0.0005	chr17
3822849	NM_207390	CLEC17A	0.55	0.00043	chr19
3826601	NM_001076678	ZNF493	0.65	0.00505	chr19
3826656	NM_001001415	ZNF429	0.61	0.00727	chr19
3830353	NM_001771	CD22	0.56	0.00584	chr19
3830359	NM_001771	CD22	0.49	0.00018	chr19
3834502	NM_001783	CD79A	0.45	5e-05	chr19
3839346	NM_003121	SPIB	0.49	0.00091	chr19
3845944	NM_052847	GNG7	0.61	0.00222	chr19
3848492	NM_002002	FCER2	0.48	0.0001	chr19
3856184	NM_001159293	ZNF737	0.58	6e-05	chr19
3869097	NM_001245	SIGLEC6	0.61	0.00306	chr19
3954879	NM_013378	VPREB3	0.47	0.00026	chr22
3962145	NM_052945	TNFRSF13C	0.55	0.00035	chr22
4003895	BC020611	CXorf21	0.62	0.00758	chrX
4006841	NM_032591	SLC9A7	0.69	0.00506	chrX
2318086	NM_003636	KCNAB2	1.51	0.00963	chr1
2318170	NM_207396	RNF207	1.3	0.00284	chr1
2318656	NM_016831	PER3	1.45	0.0021	chr1
2323899	NM_152376	UBXN10	1.74	0.00088	chr1
2330843	NM_001113482	MANEAL	1.35	0.00152	chr1
2352758	NM_198268	HIPK1	1.4	0.00424	chr1
2353237	NM_138959	VANGL1	1.33	0.00405	chr1
2353749	NM_004258	IGSF2	1.59	0.00495	chr1
2356218	NM_003637	ITGA10	1.33	0.00106	chr1
2361154	NM_152280	SYT11	1.66	0.00372	chr1
2362723	NM_001004310	FCRL6	2.52	0.00081	chr1
2362746	NM_020125	SLAMF8	1.64	0.0022	chr1
2364155	NM_175866	UHMK1	1.55	0.0058	chr1
2368590	NM_020318	PAPPA2	1.31	0.00295	chr1
2374746	NM_020443	NAV1	1.35	0.0047	chr1
2375706	NM_001001396	ATP2B4	1.78	0.00068	chr1
2382117	NM_001748	CAPN2	1.57	0.00074	chr1
2394588	NM_012405	ICMT	1.41	0.00781	chr1
2394626	NM_007274	ACOT7	1.53	0.00784	chr1
2399908	NM_181719	TMCO4	1.48	0.00298	chr1
2402493	NM_000437	PAFAH2	1.73	0.00427	chr1
2402691	NM_001114759	ZNF683	4.14	0.00018	chr1
2403027	NM_004672	MAP3K6	1.41	0.00265	chr1
2408681	NM_024503	HIVEP3	1.55	0.00613	chr1
2420642	NM_153259	MCOLN2	1.72	0.00301	chr1
2422722	NM_003243	TGFBR3	2.1	0.00274	chr1
2422967	NM_005263	GFI1	1.82	0.00029	chr1
2428405	NM_175744	RHOC	1.62	0.00228	chr1
2429371	NM_005725	TSPAN2	1.87	0.00525	chr1
2436985	NM_183001	SHC1	1.42	0.00482	chr1
2440385	NM_016382	CD244	1.7	0.00149	chr1
2451155	NM_080588	PTPN7	1.74	0.0011	chr1
2460368	NM_024525	TTC13	1.49	0.00768	chr1
2469296	BC093999	C2orf48	1.38	0.00088	chr2
2475407	NM_024692	CLIP4	1.63	0.00526	chr2
2484841	NM_006577	B3GNT2	1.79	0.00726	chr2
2485636	NM_003038	SLC1A4	1.45	0.00473	chr2
2494447	NM_004804	CIAO1	1.33	0.00188	chr2
2494472	NM_178495	ITPRIPL1	1.87	0.00041	chr2
2500919	NM_005415	SLC20A1	1.82	0.00049	chr2
2514271	NM_021176	G6PC2	1.33	0.00626	chr2
2519229	NM_002210	ITGAV	1.58	0.00012	chr2
2521278	NM_001080539	CCDC150	1.31	0.00592	chr2
2532793	NM_030803	ATG16L1	1.42	0.00503	chr2
2533670	NM_001037131	AGAP1	2.23	0.00203	chr2
2535859	NM_023083	CAPN10	1.34	0.00973	chr2
2536298	NM_001008491	SEPT2	1.45	0.00197	chr2
2539387	AK127578	C2orf46	1.81	0.00332	chr2
2553576	NM_020532	RTN4	1.51	0.00833	chr2
2558924	NM_144582	TEX261	1.34	0.00624	chr2
2559449	NM_015470	RAB11FIP5	1.64	0.00033	chr2
2599371	NM_022152	TMBIM1	1.34	0.00418	chr2
2604390	NM_005737	ARL4C	1.74	0.00807	chr2
2607262	NM_006374	STK25	1.32	0.00842	chr2
2613441	NM_003884	KAT2B	1.77	0.00224	chr3
2636786	NM_173799	TIGIT	1.68	0.00379	chr3
2648378	NM_002886	RAP2B	1.65	0.00028	chr3
2666884	NM_199347	NEK10	1.3	0.00923	chr3
2669979	NM_001337	CX3CR1	1.95	9e-05	chr3
2672140	NM_002343	LTF	3.23	0.00793	chr3
2672966	NM_002375	MAP4	1.42	0.00072	chr3
2674047	NM_002292	LAMB2	1.35	0.00407	chr3
2674963	NM_032355	MON1A	1.36	0.00941	chr3
2675208	NM_007182	RASSF1	1.59	0.00703	chr3
2675239	NM_015896	ZMYND10	1.38	0.00263	chr3
2675504	NM_013324	CISH	1.69	0.00715	chr3
2676454	NM_205853	MUSTN1	1.42	0.00011	chr3
2677723	NM_001128615	ARHGEF3	1.48	0.00243	chr3
2678400	NM_003500	ACOX2	1.31	0.00373	chr3
2681114	NM_173654	C3orf64	1.65	0.00276	chr3
2689208	NM_025146	NAT13	1.38	0.00059	chr3
2698693	NM_001039547	GK5	1.76	0.00308	chr3
2734629	NM_080683	PTPN13	1.76	0.00244	chr4
2735221	NM_000297	PKD2	1.47	0.00366	chr4
2756965	NM_012445	SPON2	1.86	0.00541	chr4
2757796	NM_020972	ZFYVE28	1.69	0.00062	chr4
2761837	NM_031950	FGFBP2	2.44	0.00998	chr4
2769063	NM_022832	USP46	1.6	0.0014	chr4
2777639	NM_198281	GPRIN3	1.58	0.00896	chr4
2807621	NM_000958	PTGER4	1.4	0.00671	chr5
2808438	NM_012343	NNT	1.42	0.00994	chr5
2877990	NM_198282	TMEM173	1.56	0.00811	chr5
2878662	NM_005219	DIAPH1	1.44	0.00381	chr5
2880051	NM_181674	PPP2R2B	2.37	0.00201	chr5
2881239	NM_002609	PDGFRB	2.53	0.00019	chr5
2881747	NM_001155	ANXA6	1.45	0.00032	chr5
2883349	NM_032782	HAVCR2	1.56	0.00232	chr5
2899372	NM_001145009	BTN3A1	1.48	0.00139	chr6
2899413	NM_006994	BTN3A3	1.34	0.00632	chr6
2908423	NM_001078177	SLC29A1	1.6	0.00587	chr6
2939034	NM_004155	SERPINB9	1.38	0.00755	chr6
2945677	NM_030939	C6orf62	1.39	0.00364	chr6
2949038	NM_004640	BAT1	1.39	0.00411	chr6
2969886	NM_002037	FYN	1.49	0.00182	chr6
2979871	NM_182961	SYNE1	1.98	0.00544	chr6
2981912	NM_003379	EZR	1.41	0.00785	chr6
2983030	NM_020133	AGPAT4	1.52	0.00679	chr6
2987211	NM_002360	MAFK	1.48	0.00058	chr7
2987523	NM_018641	CHST12	1.5	0.00867	chr7
2995491	NM_032222	FAM188B	1.31	0.00216	chr7
2999948	NM_002541	OGDH	1.55	0.00337	chr7
3011317	NM_001143935	CROT	1.58	0.00685	chr7
3015603	NM_006076	AGFG2	1.58	0.00921	chr7
3030489	NM_003575	ZNF282	1.34	0.00908	chr7
3033924	NM_014671	UBE3C	1.42	0.00323	chr7
3041875	NM_015550	OSBPL3	1.75	0.00017	chr7
3073267	NM_020911	PLXNA4	1.6	0.00062	chr7
3089140	NM_022749	FAM160B2	1.46	0.00744	chr8
3127199	NM_003974	DOK2	1.65	0.00125	chr8
3147173	NM_001040624	NCALD	1.73	0.00989	chr8
3154317	NM_001135242	NDRG1	1.34	0.00599	chr8
3157138	NM_205545	LYPD2	1.6	0.00491	chr8
3167994	NM_006285	TESK1	1.36	0.00207	chr9
3189422	NM_033446	FAM125B	1.63	0.00176	chr9
3189837	NM_007135	ZNF79	1.44	0.00861	chr9
3190002	NM_144965	TTC16	1.88	0.00011	chr9
3190420	NM_016174	CERCAM	2.05	0.00014	chr9
3190778	NM_019594	LRRC8A	1.43	0.00813	chr9
3194832	NM_206920	MAMDC4	1.44	0.00281	chr9
3203753	NM_018449	UBAP2	1.41	0.00765	chr9
3204558	BC004406	KIAA1539	2.05	0.00394	chr9
3223928	NM_004099	STOM	1.68	0.00098	chr9
3226138	NM_000476	AK1	2.27	0.00294	chr9
3228463	NM_006266	RALGDS	1.55	0.00641	chr9
3230697	NM_015392	NPDC1	1.6	0.0003	chr9
3235726	NM_001008211	OPTN	1.88	0.00369	chr10
3250699	NM_004096	EIF4EBP2	1.34	0.00015	chr10
3254521	NM_030927	TSPAN14	1.49	0.00998	chr10
3284188	NM_002211	ITGB1	1.57	0.00775	chr10
3286211	NM_145313	RASGEF1A	1.78	0.00101	chr10
3293435	NM_005041	PRF1	1.81	0.00483	chr10
3296386	NM_004747	DLG5	1.79	0.00134	chr10
3302740	NM_032709	PYROXD2	1.52	0.00789	chr10
3303913	NM_022039	FBXW4	1.42	0.00865	chr10
3304767	NM_015916	CALHM2	1.61	0.00592	chr10
3315114	NM_006659	TUBGCP2	1.44	0.0073	chr10
3322775	NM_005566	LDHA	1.4	0.00724	chr11
3327057	NM_024841	PRR5L	2.42	0.00042	chr11
3333999	BC056402	C11orf84	1.4	0.00038	chr11
3334087	NM_024771	NAT11	1.56	0.00657	chr11
3334415	NM_020155	GPR137	1.5	0.00025	chr11
3335643	NM_025128	MUS81	1.56	0.00274	chr11
3335697	NM_001335	CTSW	2.52	0.00015	chr11
3339261	NM_173042	IL18BP	1.43	0.00021	chr11
3349293	NM_181351	NCAM1	1.89	0.00132	chr11
3351166	NR_026691	IL10RA	1.32	0.00265	chr11
3359601	NM_020896	OSBPL5	1.88	0.0004	chr11
3375735	NM_001620	AHNAK	1.44	0.0059	chr11
3378790	NM_001008709	PPP1CA	1.54	0.00819	chr11
3382319	NM_030792	GDPD5	1.67	0.00463	chr11
3385307	NM_001161586	ME3	1.74	0.00346	chr11
3389077	NM_025208	PDGFD	2.12	0.00294	chr11
3402736	NM_002824	PTMS	1.77	0.00063	chr12
3403045	NM_001007026	ATN1	1.41	0.00216	chr12
3403244	NM_014718	CLSTN3	1.99	0.00189	chr12
3416921	NM_002905	RDH5	1.31	0.00178	chr12
3417201	NM_022465	IKZF4	1.34	0.00835	chr12
3417485	NM_024068	OBFC2B	1.39	0.00493	chr12
3418329	NM_178502	DTX3	1.58	0.00631	chr12
3443296	NM_002355	M6PR	1.36	0.0062	chr12
3454576	NM_000617	SLC11A2	1.39	0.00781	chr12
3454892	NM_007210	GALNT6	1.42	0.00696	chr12
3468103	NM_024312	GNPTAB	1.51	0.00792	chr12
3473727	NM_018639	WSB2	1.36	0.00123	chr12
3497659	NM_021033	RAP2A	1.95	0.0002	chr13
3502497	NM_001008895	CUL4A	1.57	0.00962	chr13
3529857	BC025332	C14orf21	1.51	0.00924	chr14
3529877	NM_019839	LTB4R2	1.53	0.00417	chr14
3535780	NM_000956	PTGER2	1.88	0.00505	chr14
3538893	NM_006255	PRKCH	1.52	0.00788	chr14
3539201	NM_031914	SYT16	1.34	0.00763	chr14
3545130	NM_014909	VASH1	1.65	0.00651	chr14
3554622	NM_001100913	PACS2	1.36	0.00295	chr14
3565524	NM_000161	GCH1	1.57	0.00811	chr14
3567970	NM_145171	GPHB5	1.33	0.00845	chr14
3571248	NM_021260	ZFYVE1	1.37	0.00874	chr14
3576441	NM_001080414	CCDC88C	1.51	0.00623	chr14
3577715	NM_173850	SERPINA12	1.31	0.00745	chr14
3587015	NM_015995	KLF13	1.51	0.00723	chr15
3589141	NM_152594	SPRED1	1.53	0.00604	chr15
3598662	NM_002755	MAP2K1	1.39	0.00019	chr15
3600489	NM_014249	NR2E3	1.39	0.0018	chr15
3613338	NM_144599	NIPA1	1.54	0.00988	chr15
3614305	NM_024490	ATP10A	1.6	0.0062	chr15
3619595	NM_018145	FAM82A2	1.61	0.00176	chr15
3633109	NM_001099436	ULK3	1.41	0.00548	chr15
3634458	NM_144572	TBC1D2B	1.5	0.00903	chr15
3636522	NM_016073	HDGFRP3	1.66	0.00816	chr15
3642946	NM_005632	SOLH	1.67	0.00328	chr16
3644887	NM_020705	TBC1D24	1.58	0.00143	chr16
3652424	NM_013302	EEF2K	1.39	0.00772	chr16
3655172	NM_032038	SPNS1	1.41	0.00321	chr16
3655574	NM_001030288	SPN	1.71	0.00333	chr16
3656223	NM_002209	ITGAL	1.65	0.00173	chr16
3662774	NM_153837	GPR114	1.72	0.0034	chr16
3665230	NM_001040667	HSF4	1.38	0.0006	chr16
3683037	NM_015161	ARL6IP1	1.31	0.00324	chr16
3701000	NM_001031804	MAF	1.99	0.00086	chr16
3712062	NM_016113	TRPV2	1.77	0.00085	chr17
3720402	NM_001005862	ERBB2	2.22	0.00155	chr17
3724858	NM_013351	TBX21	2.07	0.00261	chr17
3725602	NM_016428	ABI3	2	0.00048	chr17
3730731	NM_005828	DCAF7	1.37	0.00486	chr17
3731543	NM_003835	RGS9	2.43	0.00055	chr17
3734453	NM_004252	SLC9A3R1	1.55	0.00271	chr17
3734903	NM_001031803	LLGL2	1.7	0.00817	chr17
3735847	NM_006640	SEPT9	1.32	0.00612	chr17
3738969	NM_004514	FOXK2	1.35	0.00363	chr17
3739162	NM_005993	TBCD	1.72	0.00051	chr17
3740264	NM_001135642	INPP5K	1.34	0.00841	chr17
3744013	NM_004732	KCNAB3	1.75	0.00052	chr17
3744377	NM_201520	SLC25A35	1.36	0.00707	chr17
3749010	NM_014683	ULK2	1.43	0.00294	chr17
3750842	NM_144610	FLJ25006	1.75	0.00383	chr17
3753833	NM_152781	C17orf66	1.49	0.00833	chr17
3755580	NM_199247	CACNB1	1.64	0.00064	chr17
3758291	NM_006373	VAT1	1.38	0.00892	chr17
3764289	NM_004758	BZRAP1	1.98	0.00209	chr17
3777470	NM_001105244	PTPRM	3.22	2e-05	chr18
3781734	NM_013326	C18orf8	1.54	0.00048	chr18
3801411	NM_000271	NPC1	1.6	0.00147	chr18
3807261	NM_005904	SMAD7	1.84	0.00033	chr18
3815834	NM_170711	DAZAP1	1.46	0.00451	chr19
3820501	NM_001111307	PDE4A	1.62	0.0013	chr19
3824153	NM_001033549	C19orf62	1.52	0.00682	chr19
3829471	NM_024076	KCTD15	1.6	1e-05	chr19
3831168	NM_001749	CAPNS1	1.52	0.00028	chr19
3851703	NM_024038	C19orf43	1.42	0.00856	chr19
3854693	NM_005535	IL12RB1	1.6	0.00517	chr19
3857811	NM_031448	C19orf12	1.5	0.00505	chr19
3864519	NM_145296	CADM4	1.36	0.00832	chr19
3868987	NM_152353	CLDND2	1.88	0.00062	chr19
3868998	NM_005601	NKG7	1.71	0.00293	chr19
3874168	NM_001501	GNRH2	1.34	0.0099	chr20
3874438	NM_021873	CDC25B	1.61	0.00154	chr20
3880629	NM_003650	CST7	1.8	0.00631	chr20
3882190	NM_025227	BPIL1	1.32	0.00484	chr20
3886889	NM_015937	PIGT	1.43	0.00028	chr20
3890870	NM_020673	RAB22A	1.42	0.00478	chr20
3895679	NM_001039140	C20orf27	1.54	0.00241	chr20
3901361	NM_001898	CST1	1.32	0.00365	chr20
3907011	NM_000022	ADA	1.72	0.00131	chr20
3907830	NM_133171	ELMO2	1.45	0.00111	chr20
3916576	NM_002040	GABPA	1.55	0.00982	chr21
3918104	NM_058187	C21orf63	1.84	0.00764	chr21
3918535	NM_000628	IL10RB	1.58	0.00037	chr21
3918953	AK127913	FLJ46020	1.62	0.00865	chr21
3919033	NM_006933	SLC5A3	1.69	0.00066	chr21
3920003	NM_005441	CHAF1B	2	2.46e-06	chr21
3920566	NM_101395	DYRK1A	1.35	0.00892	chr21
3922602	NM_018961	UBASH3A	2.01	0.00213	chr21
3922664	NM_018964	SLC37A1	1.41	0.00747	chr21
3923218	NM_015056	RRP1B	1.77	0.00067	chr21
3923257	NM_003681	PDXK	1.93	0.00012	chr21
3923312	NM_003683	RRP1	1.43	0.00635	chr21
3923354	NM_020132	AGPAT3	2.05	1e-05	chr21
3923426	NM_020132	AGPAT3	1.79	1.39e-06	chr21
3923436	NM_003274	TRAPPC10	1.78	3.88e-06	chr21
3923498	NM_005049	PWP2	1.9	0.00317	chr21
3923537	NM_004649	C21orf33	2.01	0.00074	chr21
3923632	NR_024108	PFKL	1.74	0.00031	chr21
3923702	NM_003307	TRPM2	1.51	0.00428	chr21
3924041	NR_027673	ADARB1	1.44	0.00398	chr21
3924424	NM_001849	COL6A2	2.04	0.00061	chr21
3924573	NM_006031	PCNT	2.04	8e-05	chr21
3924674	NM_015151	DIP2A	2	0.00105	chr21
3924783	NM_206962	PRMT2	2.02	0.00406	chr21
3926080	NM_001130914	BTG3	1.99	0.0085	chr21
3926138	NM_001100420	C21orf91	1.61	0.00249	chr21
3926271	NM_002772	PRSS7	1.34	0.0033	chr21
3927949	NM_015565	RNF160	1.56	0.00599	chr21
3928668	NM_003253	TIAM1	1.46	0.00412	chr21
3928866	NM_020706	SFRS15	1.49	0.00094	chr21
3929038	NM_018944	C21orf45	2.05	0.00585	chr21
3929291	AF282851	C21orf59	1.85	0.00685	chr21
3929325	NM_003895	SYNJ1	1.7	0.00186	chr21
3929395	NR_027873	C21orf66	2.16	0.00383	chr21
3929664	NM_006134	TMEM50B	1.94	0.00063	chr21
3929721	NM_000819	GART	1.9	0.00107	chr21
3929775	NM_017613	DONSON	1.52	0.00072	chr21
3929931	NM_001697	ATP5O	1.43	0.00601	chr21
3930235	NM_004414	RCAN1	1.85	0.00011	chr21
3930360	NM_001001890	RUNX1	1.5	0.00179	chr21
3930781	NM_017438	SETD4	2.02	0.00064	chr21
3931112	NM_000411	HLCS	1.6	0.00454	chr21
3931329	NM_006052	DSCR3	1.5	0.00079	chr21
3933331	NM_015500	C2CD2	1.49	0.00522	chr21
3933536	NM_003226	TFF3	1.33	4e-05	chr21
3933566	NM_024022	TMPRSS3	1.7	4e-05	chr21
3933817	NM_018669	WDR4	1.65	0.00398	chr21
3934245	NM_000100	CSTB	1.67	0.00111	chr21
3934591	NM_198694	KRTAP10-5	1.34	0.00674	chr21
3934652	NM_182688	UBE2G2	1.7	0.00149	chr21
3934669	NM_006936	SUMO3	1.84	0.00022	chr21
3934695	NM_004339	PTTG1IP	1.46	0.00637	chr21
3934729	NM_000211	ITGB2	1.73	0.0035	chr21
3934867	NM_015227	POFUT2	1.6	0.0003	chr21
3935243	NM_001145437	LSS	2.54	2.1e-06	chr21
3935300	NM_003906	MCM3AP	1.63	0.00261	chr21
3937183	NM_022720	DGCR8	1.73	0.00084	chr22
3937587	NM_001003891	MED15	1.46	0.00653	chr22
3945585	NM_152426	APOBEC3D	1.42	0.00506	chr22
3948259	NM_001017526	ARHGAP8	1.71	0.00512	chr22
3949162	NM_015124	GRAMD4	1.5	0.00396	chr22
3955915	NM_003595	TPST2	1.54	0.00112	chr22
3965536	NM_015166	MLC1	1.89	0.00022	chr22
3966057	NR_027928	CHKB-CPT1B	1.9	0.00308	chr22
3980643	NM_021120	DLG3	1.65	0.00903	chrX
3995765	NM_001395	DUSP9	1.32	0.00119	chrX
4007437	NM_033518	SLC38A5	1.84	0.0081	chrX
4026757	NM_032512	PDZD4	1.59	0.00348	chrX
4027532	NM_001081573	GAB3	1.74	0.00192	chrX
