# Supplementary material for: Genome-Wide Expression Analysis in Down Syndrome: Insight into Immunodeficiency
Source: PLoS One. 2012 Nov 14;7(11):e49130. doi: 10.1371/journal.pone.0049130 (PMC3498323; doi:10.1371/journal.pone.0049130)
Supplement: Table S4 — Characteristics of samples. (DOC) [file pone.0049130.s006.doc]

**Table S4. Characteristics of samples**

| Age group | Sample ID | Sex | Age |
| --- | --- | --- | --- |
| Child group a | C1 | Female | 11 years |
| C2 | Male | 13 years |
| C3 | Male | 12 years |
| C4 | Male | 12 years |
| C5 | Male | 12 years |
| C6 | Male | 9 years |
| C7 | Female | 9 years |
| C8 | Male | 8 years |
| C9 | Female | 4 years |
| C10 | Male | 5 years |
| C11 | Male | 5 years |
| C12 | Female | 3 years |
| C13 | Female | 3 years |
| C14 | Male | 2.5 years |
| C15 | Male | 2 years |
| D1 | Female | 11 years |
| D2 | Male | 11 years |
| D3 | Male | 11 years |
| D4 | Male | 6 years |
| D5 | Male | 5 years |
| D6 | Female | 4 years |
| D7 | Female | 2 years |
| D8 | Female | 2 years |
| D9 | Male | 2 years |
| D10 | Male | 1 years |
| Neonate group b | C16 | Male | 3 days |
| C17 | Male | 7 days |
| C18 | Female | 30 days |
| C19 | Male | 23 days |
| C20 | Male | 28 days |
| C21 | Female | 38 days |
| C22 | Female | 23 days |
| D11 | Male | 7 days |
| D12 | Female | 10 days |
| D13 | Female | 7 days |
| D14 | Female | 11 days |
| D15 | Female | 30 days |

a peripheral blood mononuclear cells (PBMCs)

b peripheral blood cells (PBCs)
